# Supplementary material
Source: Royal Society of Chemistry journal article supplement (doi:10.1039/d6an00356g)
Supplement: d6an00356g1.pdf [file d6an00356g1.pdf]

**Supporting Information**

**Multiplexed Profiling of Breast Cancer Exosomes Based  
on an Asymmetric Bipolar Electrode  
Electrochemiluminescence Immunochip**

Xin Hua,<sup>a</sup> Jianmei Han,<sup>a</sup> Tingting Han,<sup>a</sup> Gaohua Han,<sup>b</sup> Wei Zhang,<sup>b</sup> Ran Chen,<sup>a</sup>  
Songqin Liu<sup>a,\*</sup>

<sup>a</sup>Jiangsu Engineering Laboratory of Smart Carbon-Rich Materials and Device, School of Chemistry and Chemical Engineering, Southeast University, Nanjing 211189, PR China.

<sup>b</sup>Department of Oncology, Taizhou People's Hospital Affiliated to Nanjing Medical University, Taizhou 225300, PR China.

Corresponding author email: [liusq@seu.edu.cn](mailto:liusq@seu.edu.cn)

## Experimental Section

### Materials and Reagents

The electrochemical aptamer probes were designed based on previously reported sequences and synthesized by Sangon Biotech Co., Ltd. (Shanghai, China) and purified by HPLC. Their sequences were listed in Table S4. The obtained lyophilized aptamer powders were dissolved to a concentration of 100  $\mu\text{M}$  according to the specified ratio, annealed at 95  $^{\circ}\text{C}$  for 5 min, and then allowed to cool naturally to 4  $^{\circ}\text{C}$ . The annealed probes were aliquoted and stored at -20  $^{\circ}\text{C}$  for later use. Laser-etched ITO-coated aluminosilicate glass slides (ITO, with a thickness  $\sim 185$  nm, sheet resistance  $\sim 6 \Omega/\text{m}^2$ ) were purchased from South China Xiangcheng Technology Co., Ltd. (Shenzhen, China). Photomask films were produced by Kunshan Kaisheng Electronics Co., Ltd. Polydimethylsiloxane (PDMS, RTV 615) base (part A) and curing agent (part B) were obtained from Sylgard 184 (Dow Corning, Midland, MI, USA). Single-side polished silicon wafers were purchased from Shanghai Xiangjing Electronic Technology Co., Ltd. (Shanghai, China). Negative photoresist (SU-8 2050) and the corresponding developer were purchased from MicroChem Corp. (USA). (3-Aminopropyl) triethoxysilane (APTES), sodium cyanoborohydride ( $\text{NaCNBH}_3$ ), and glutaraldehyde (25 % aqueous solution) were all purchased from Macklin Biochemical Co., Ltd. (Shanghai, China). Luminol-L012 was obtained from Wako Pure Chemical Industries, Ltd. (Japan). Potassium ferrocyanide trihydrate ( $\text{K}_4[\text{Fe}(\text{CN})_6] \cdot 3\text{H}_2\text{O}$ ), potassium ferricyanide ( $\text{K}_3[\text{Fe}(\text{CN})_6]$ ), hydrogen peroxide ( $\text{H}_2\text{O}_2$ , 30 %), and ammonium hydroxide ( $\text{NH}_4\text{OH}$ , 25 %) were purchased from Sinopharm Chemical Reagent Co., Ltd. (Shanghai, China). Other reagents, including acetone, anhydrous sodium sulfite ( $\text{Na}_2\text{SO}_3$ ), disodium hydrogen phosphate ( $\text{Na}_2\text{HPO}_4$ ), and sodium dihydrogen phosphate ( $\text{NaH}_2\text{PO}_4$ ), were also obtained from Sinopharm Chemical Reagent Co., Ltd. (Shanghai, China). Bovine serum albumin (BSA) was purchased from Solarbio Life Sciences Co., Ltd. (Beijing, China). A 0.01 M phosphate-buffered saline (PBS) solution was prepared by mixing appropriate amounts of 0.01 M  $\text{Na}_2\text{HPO}_4$  and  $\text{NaH}_2\text{PO}_4$ , and the pH was adjusted to 7.0 using a

pH meter (Mettler-Toledo SevenCompact, Switzerland). PBST was prepared by adding 0.05 % (v/v) Tween-20 to the as-prepared PBS solution. A 1 % (w/v) BSA solution in PBS was used as a blocking agent during antigen/antibody immobilization steps. Mucin 1 (MUC1) and casein were purchased from Sigma-Aldrich.  $\alpha$ -Chymotrypsin ( $\alpha$ -Chymase) was purchased from Macklin Biochemical Co., Ltd. Transferrin (TRF) was obtained from Solarbio Life Sciences Co., Ltd. (Beijing, China). Cell culture medium (DMEM), fetal bovine serum (FBS), and trypsin digestion solution were purchased from KeyGEN Biotech Co., Ltd. (Nanjing, China). Uranyl acetate (1 %) was purchased from Beijing Zhongjing Keyi Co., Ltd. Deionized water (resistivity 18.2 M $\Omega$ ·cm) used throughout the experiments was produced by a Thermo Scientific Smart2 Pure Water System (USA). Mouse anti-human CD63 monoclonal antibody was purchased from Thermo Fisher Scientific Inc.

### **Instrumentation**

High-sensitivity imaging was performed using an Andor iXon Ultra 888 EMCCD camera (Andor Technology, UK). Electrochemical measurements were carried out with a CHI 660E electrochemical workstation (CH Instruments, Shanghai, China). ECL analysis was conducted on an MPI-E ECL analyzer (Remax Analytical, Xi'an, China). The microscopic morphology of exosomes was characterized by a JEM-2100 transmission electron microscope (JEOL, Japan). Centrifugation during sample preparation was performed using a Thermo Scientific Multifuge X1R centrifuge and a Thermo Scientific refrigerated centrifuge. Cells were cultured in a Thermo Scientific Steri-Cycle i160 CO<sub>2</sub> incubator. Aseptic operations were conducted in a BHC-1300IIA2 biological safety cabinet (Beijing Airtest Scientific Equipment Co., Ltd., China).

### **Cell Culture and Processing**

All cell lines used in this study were purchased from the Cell Bank of the Chinese Academy of Sciences (Shanghai, China). Triple-negative breast cancer cells (MDA-MB-231) and low-invasive breast cancer cells (MCF-7) were cultured in complete DMEM supplemented with 10% FBS, 100 U/mL penicillin, and 100  $\mu$ g/mL streptomycin. Normal mammary epithelial cells (MCF-10A) were cultured in MCF-

10A-specific medium. All cells were maintained in a humidified sterile incubator at 37 °C with 5% CO<sub>2</sub>. The culture medium was changed every other day, and subculture was performed when the cell confluency reached 80-90%.

### **Isolation and Characterization of Exosomes**

After culturing the cells for 48 h, exosomes were isolated from the cell culture supernatant using ultracentrifugation. The specific procedure was as follows: First, the supernatant was centrifuged at  $300 \times g$  for 10 min to remove cells. Then, it was centrifuged at  $2,000 \times g$  for 10 min to pellet cell debris, followed by centrifugation at  $10,000 \times g$  for 30 min to remove large vesicles. Finally, exosomes were pelleted via ultracentrifugation at  $100,000 \times g$  for 70 min. The resulting pellet was resuspended in PBS and subjected to a second ultracentrifugation step at  $100,000 \times g$  for 70 min to obtain purified exosomes. The purified exosome pellet was resuspended in PBS and stored at -80 °C.

The morphology of the isolated exosomes was characterized by transmission electron microscopy (TEM). A 10  $\mu$ L aliquot of the purified exosome suspension was applied onto a copper grid and allowed to adsorb for 10 min, after which excess liquid was removed using filter paper. The grid was then rinsed with 10  $\mu$ L of ultrapure water for 10 min, stained with 10  $\mu$ L of 1% uranyl acetate solution for 5 min, and blotted dry with filter paper. After air-drying, images were acquired using a TEM operated at 80 kV. The concentration and size distribution of exosomes were determined by nanoparticle tracking analysis (NTA). The sample was appropriately diluted with PBS to achieve an optimal concentration for measurement. Then, 3–5 mL of the diluted sample was injected into the detection chamber, and the exosome concentration as well as the mean particle size were analyzed using the accompanying software (ZetaView 8.03.04.01). Transmission electron microscopy (TEM) imaging (Figure S1) revealed that the isolated vesicles exhibited the characteristic cup-shaped morphology typical of exosomes. Nanoparticle tracking analysis (NTA) indicated that the size distribution of these vesicles peaked at approximately 110 nm, with the vast majority of particles ranging between 50 and 150 nm in diameter. These morphological and size-distribution characteristics are in strong agreement with the

defining criteria for exosomes outlined in the guidelines of the International Society for Extracellular Vesicles (ISEV).

### **Serum collection and processing**

Clinical blood samples of healthy donors and patients were collected with informed consent according to the Institutional Review Board (IRB) protocol at Taizhou People's Hospital. A total of 20 patients and 10 healthy donors were included in this study. Clinical information of all samples was listed in Table S3. All blood samples were centrifuged at 3000 rpm for 15 min to obtain serum samples. The serum samples were stored at -80 °C for later processing.

## Exosome Morphology and NTA Characterization

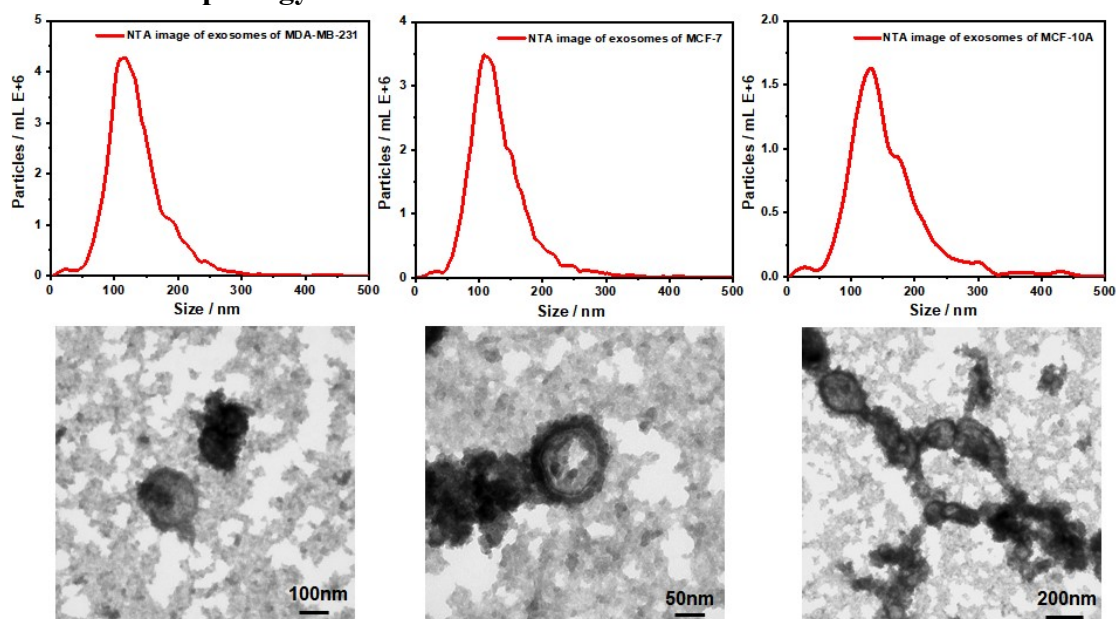

Figure S1. TEM images and NTA size distribution profile of isolated exosomes. Scale bars are 100 nm, 50 nm, and 200 nm, respectively.

Table S1 Intra- and inter-assay precision of the BPE-ECL immunosensing platform at different exosome concentration levels. (n=5)

| Level          | Conc (particles/ $\mu$ L) | Intra-assay RSD | Inter-assay RSD |
|----------------|---------------------------|-----------------|-----------------|
| Low (near LOD) | 14                        | 4.66%           | 7.09%           |
| High           | 140                       | 2.21%           | 2.44%           |

Table S2 Comparison of different sensing methods for exosome detection.

| Method           | Linear range (particles/ $\mu$ L)      | LOD (particles/ $\mu$ L) | Time (h) | Ref |
|------------------|----------------------------------------|--------------------------|----------|-----|
| Colorimetry      | $10^3$ to $10^5$                       | 394                      | 1.0      | [1] |
| Colorimetry      | $1.4 \times 10^3$ to $2.8 \times 10^5$ | 160                      | 6.0      | [2] |
| Electrochemistry | $4.0 \times 10^3$ to $8.0 \times 10^7$ | 920                      | 2.5      | [3] |
| Electrochemistry | $10^4$ to $10^7$                       | 9961                     | 3.0      | [4] |
| Electrochemistry | $0.5$ to $5.0 \times 10^3$             | 482                      | 4.0      | [5] |

|                          |                                              |      |     |              |
|--------------------------|----------------------------------------------|------|-----|--------------|
| Electrochemistry         | $10^2$ to $10^7$                             | 43   | 4.5 | [6]          |
| Electrochemistry         | $1.1 \times 10^2$ to $1.1 \times 10^8$       | 96   | 6.5 | [7]          |
| Fluorescence             | $1.5 \times 10^3$ to $5.0 \times 10^6$       | 880  | 1.2 | [8]          |
| Fluorescence             | $8.5 \times 10^3$ to $8.5 \times 10^5$       | 4500 | 4.0 | [9]          |
| Fluorescence             | $1.7 \times 10^4$ to<br>$1.7 \times 10^{10}$ | 180  | 10  | [10]         |
| Fluorescence             | $1.66 \times 10^3$ to<br>$1.66 \times 10^6$  | 480  | 4.0 | [11]         |
| Digital ECL              | $10^2$ – $10^5$                              | 10   | 1.5 | [12]         |
| CRISPR-enhanced<br>assay | $10$ – $10^5$                                | 0.98 | 3.0 | [13]         |
| ECL                      | $1.0 \times 10^4$ to<br>$3.16 \times 10^6$   | 9080 | 1.4 | [14]         |
| ECL                      | $5.0 \times 10^2$ to $1.0 \times 10^5$       | 195  | 4.0 | [15]         |
| ECL                      | $5.0 \times 10^2$ to $1.0 \times 10^6$       | 125  | 4.0 | [16]         |
| ECL                      | $10^2$ to $10^5$                             | 30   | 6.0 | [17]         |
| ECL                      | $10^2$ to $10^4$                             | 11   | 0.6 | [18]         |
| ECL                      | 14 to $1.4 \times 10^4$                      | 1.39 | 2   | This<br>work |

Table S3 Detailed Information of Clinical Serum Samples.

| Sample ID | Status | Gender | Age | Subtype | Pathology |
|-----------|--------|--------|-----|---------|-----------|
| 1         | BC     | Female | 50  | TNBC    | Malignant |
| 2         | BC     | Female | 54  | TNBC    | Malignant |
| 3         | BC     | Female | 42  | TNBC    | Malignant |
| 4         | BC     | Female | 74  | TNBC    | Malignant |
| 5         | BC     | Female | 48  | TNBC    | Malignant |
| 6         | BC     | Female | 54  | TNBC    | Malignant |
| 7         | BC     | Female | 52  | TNBC    | Malignant |

|    |    |        |    |                      |           |
|----|----|--------|----|----------------------|-----------|
| 8  | BC | Female | 55 | TNBC                 | Malignant |
| 9  | BC | Female | 63 | TNBC                 | Malignant |
| 10 | BC | Female | 54 | HR+/HER2-            | Malignant |
| 11 | BC | Female | 41 | HR+/HER2-            | Malignant |
| 12 | BC | Female | 49 | HR+/HER2-            | Malignant |
| 13 | BC | Female | 51 | HR+/HER2-            | Malignant |
| 14 | BC | Female | 59 | HR+/HER2-            | Malignant |
| 15 | BC | Female | 57 | HR+/HER2-            | Malignant |
| 16 | BC | Female | 58 | HR+/HER2-            | Malignant |
| 17 | BC | Female | 60 | HR+/HER2-            | Malignant |
| 18 | BC | Female | 39 | HR+/HER2-            | Malignant |
| 19 | BC | Female | 63 | HR+/HER2-            | Malignant |
| 20 | BC | Female | 58 | HR+/HER2-            | Malignant |
| 21 | HD | Female | 54 | No history of cancer | Control   |
| 22 | HD | Female | 48 | No history of cancer | Control   |
| 23 | HD | Female | 46 | No history of cancer | Control   |
| 24 | HD | Female | 36 | No history of cancer | Control   |
| 25 | HD | Female | 31 | No history of cancer | Control   |
| 26 | HD | Female | 23 | No history of cancer | Control   |
| 27 | HD | Female | 22 | No history of cancer | Control   |
| 28 | HD | Female | 29 | No history of cancer | Control   |
| 29 | HD | Female | 22 | No history of cancer | Control   |
| 30 | HD | Female | 28 | No history of cancer | Control   |

HD: healthy donor

Table S4 DNA sequences used in this work

| DNA                     | Sequences and modification (5'-3')                                                    | Ref  |
|-------------------------|---------------------------------------------------------------------------------------|------|
| Fc-Apt <sub>EpCAM</sub> | Fc-CACTACAGAGGTTGCGTCTGT                                                              | [1]  |
| Fc-Apt <sub>CD61</sub>  | Fc-TCCACGATGTAGGATCCACATGAGCGCTCCTGTTACCCTG                                           | [19] |
| Fc-Apt <sub>CD44</sub>  | Fc-<br>GAGATTCATCACGCGCATAGTCCCAAGGCCTGCAAGGGAACCA<br>AG GACACAGCGACTATGCGATGATGTCTTC | [20] |

## References

- 1 J. Kuang, Z. Fu, X. Sun, C. Lin, S. Yang, J. Xu, M. Zhang, H. Zhang, F. Ning and P. Hu, *Analyst*, 2022, **147**, 5054–5061.
- 2 Y. Zhang, D. Wang, S. Yue, Y. Lu, C. Yang, J. Fang and Z. Xu, *ACS Sens.*, 2019, **4**, 3210–3218.
- 3 Y. Yu, Q. Guo, W. Jiang, H. Zhang and C. Cai, *Anal. Chem.*, 2021, **93**, 11298–11304.
- 4 J. Lu, M. Wang, Y. Han, Y. Deng, Y. Zeng, C. Li, J. Yang and G. Li, *Anal. Chem.*, 2022, **94**, 5055–5061.
- 5 Q. Liu, X. Yue, Y. Li, F. Wu, M. Meng, Y. Yin and R. Xi, *Talanta*, 2021, **232**, 122451.
- 6 L. Zhuang, Q. You, X. Su, Z. Chang, M. Ge, Q. Mei, L. Yang, W. Dong and L. Li, *Sensors*, 2023, **23**, 3508.
- 7 Y. An, T. Jin, Y. Zhu, F. Zhang and P. He, *Biosens. Bioelectron.*, 2019, **142**, 111503.
- 8 Z. Fan, Q. Weng, Y. Li, T. Zeng, J. Wang, H. Zhang, H. Yu, Y. Dong, X. Zhao and G. Li, *Anal. Chim. Acta*, 2023, **1251**, 340984.
- 9 Y. Zhang, J. Fan, J. Zhao, Z. Xu, B. Sun, Y. Liu, R. Fan, X. Pang and X. Meng, *Biosens. Bioelectron.*, 2022, **216**, 114373.
- 10 Z. Lu, Y. Shi, Y. Ma, B. Jia, X. Li, X. Guan and Z. Li, *Anal. Chem.*, 2022, **94**, 9466–9471.
- 11 Y. Pan, L. Wang, Y. Deng, M. Wang, Y. Peng, J. Yang and G. Li, *Chem. Commun.*, 2020, **56**, 13768–13771.
- 12 X. Meng, X. Pang, X. Liu, S. Luo, X. Zhang and H. Dong, *Anal. Chem.*, 2024, **96**, 13299–13307.
- 13 X. Hu, L. Zhao, C. Li, Y. Li, M. Wang, J. Yang and G. Li, *J. Electroanal. Chem.*, 2024, **953**, 118024.
- 14 Y. Wang, J. Shu, A. Lyu, M. Wang, J. Yang and G. Li, *ACS Appl. Nano Mater.*, 2023, **6**, 4214–4223.
- 15 H. Zhang, X. Zhou, F. Zhang, Y. Li, M. Wang, J. Yang and G. Li, *Ultrason. Sonochem.*, 2023, **94**, 106330.
- 16 H. Zhang, Z. Wang, Q. Zhang, F. Wang and Y. Liu, *Biosens. Bioelectron.*, 2019, **124–125**, 184–190.
- 17 H. Zhang, Z. Wang, F. Wang, Y. Zhang, H. Wang and Y. Liu, *Anal. Chem.*, 2020, **92**, 5546–5553.
- 18 X. Yang, L. Liu, Y. Feng, Y. Li, M. Wang, J. Yang and G. Li, *Anal. Chem.*, 2024, **96**, 10459–10466.
- 19 X. Teng, Y. Wang, L. You, L. Wei, C. Zhang and Y. Du, *Anal. Chem.*, 2023, **95**, 12406–12418.

20 T. Gao, W. Li, J. Ma, Y. Chen, Z. Wang, N. Sun and R. Pei, *Talanta*, 2023, **262**, 124728.
